# Supplementary material for: Synergy of nanocrystalline carbon nitride with Cu single atom catalyst leads to selective photocatalytic reduction of CO2 to methanol
Source: Royal Society of Chemistry journal article supplement (doi:10.1039/d4se00028e), 2024-01-01
Supplement: d4se00028e1.pdf [file d4se00028e1.pdf]

## Synergy of Nanocrystalline Carbon Nitride with Cu Single Atom Catalyst Leads to Selective Photocatalytic Reduction of CO<sub>2</sub> to Methanol

Tara M. LeMercier,<sup>a</sup> Madasamy Thangamuthu,<sup>\*a</sup> Emerson C. Kohlrausch,<sup>a</sup> Yifan Chen,<sup>a</sup> Craig T. Stoppiello,<sup>b</sup> Michael W. Fay,<sup>b</sup> Graham A. Rance,<sup>b</sup> Gazi N. Aliev,<sup>c</sup> Wolfgang Theis,<sup>c</sup> Johannes Biskupek,<sup>d</sup> Ute Kaiser,<sup>d</sup> Anabel E. Lanterna,<sup>a</sup> Jesum Alves Fernandes,<sup>a</sup> and Andrei N. Khlobystov<sup>\*a</sup>

<sup>a</sup>School of Chemistry, University of Nottingham, University Park, Nottingham NG7 2RD, United Kingdom

<sup>b</sup>Nanoscale and Microscale Research Centre (nmRC), University of Nottingham, Nottingham, NG7 2QL, United Kingdom

<sup>c</sup>School of Physics and Astronomy, University of Birmingham, Edgbaston, Birmingham B15 2TT, United Kingdom

<sup>d</sup>Electron Microscopy Group of Materials Science, Ulm University, 89081 Ulm, Germany

E-mail: [andrei.khlobystov@nottingham.ac.uk](mailto:andrei.khlobystov@nottingham.ac.uk), [madasamy.thangamuthu1@nottingham.ac.uk](mailto:madasamy.thangamuthu1@nottingham.ac.uk)

### Supporting information

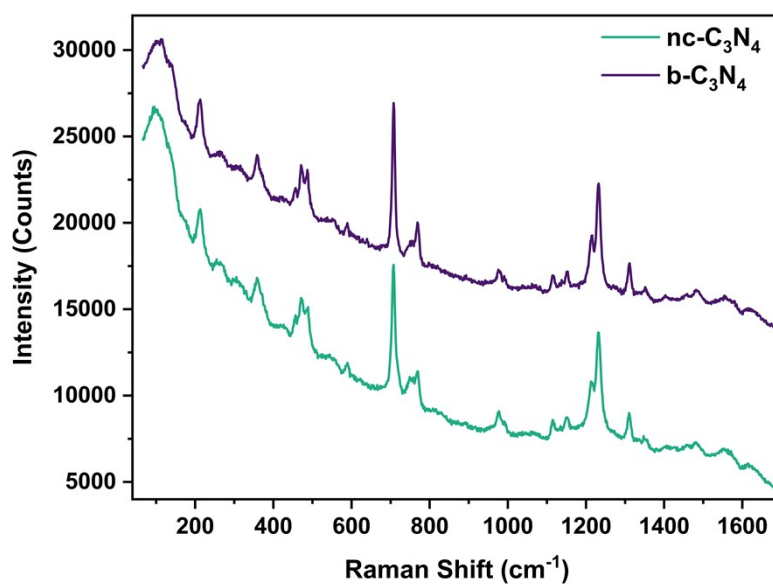

**Figure S1.** Raman analysis with a 785 nm laser indicates melon structure for both materials and b-C<sub>3</sub>N<sub>4</sub> baseline fluorescence is higher due to a higher rate of charge recombination.

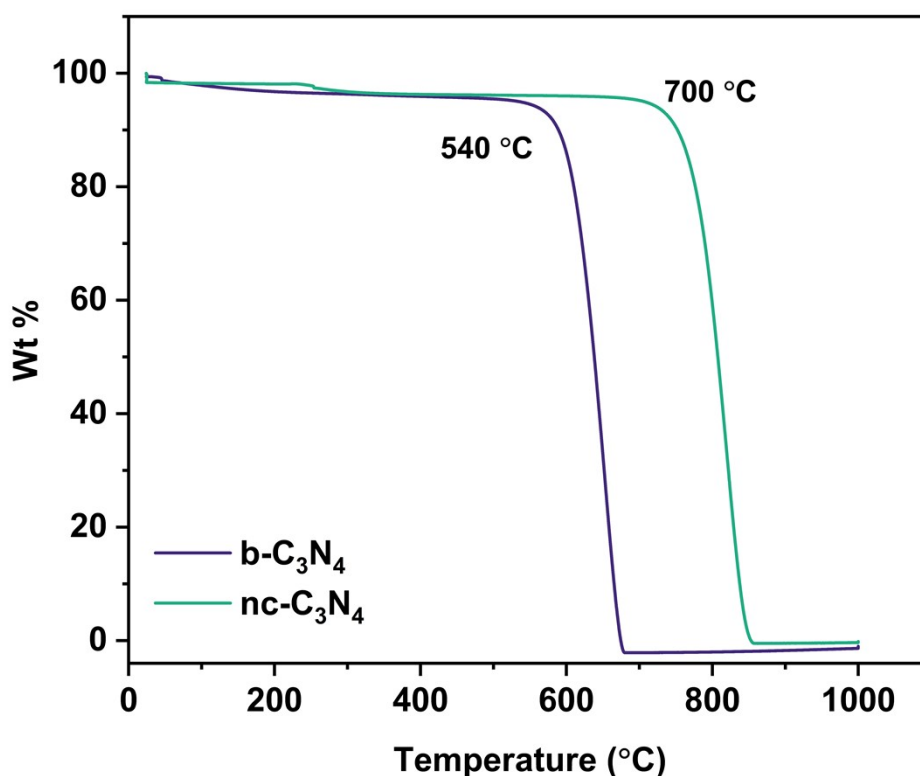

**Figure S2.** TGA in air shows oxidation onset temperature increases for nc-C<sub>3</sub>N<sub>4</sub> (from 540 °C to 700 °C).

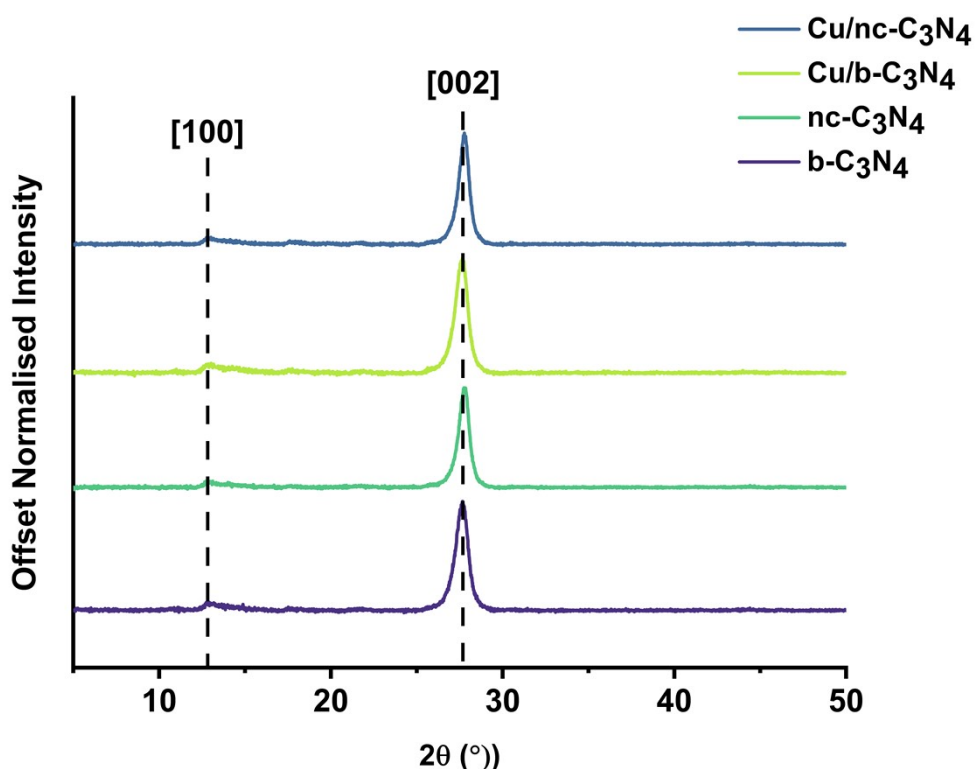

**Figure S3.** Powder XRD comparison of all materials: Cu/nc-C<sub>3</sub>N<sub>4</sub> (dark blue) and Cu/b-C<sub>3</sub>N<sub>4</sub> (light green) show no diffractions related to Cu and only have those pertinent to C<sub>3</sub>N<sub>4</sub> materials. nc-C<sub>3</sub>N<sub>4</sub> (dark green) and b-C<sub>3</sub>N<sub>4</sub> (purple) show diffractions (100) related to the in-plane tri-s-triazine and (002) related to the interlayer stacking.

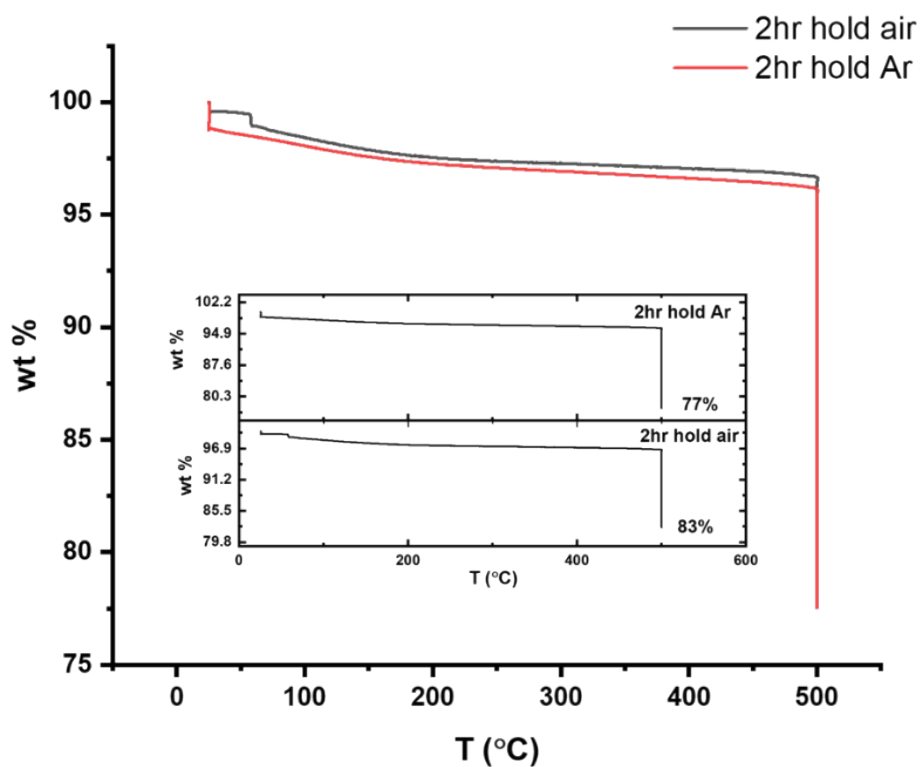

**Figure S4.** TGA of nc-C<sub>3</sub>N<sub>4</sub> emulating reaction conditions (500 °C, 2hr) in air (black) and Ar (Red). It is observed (insert) that thermal treatment in air shows higher residual weight. Suggesting that some oxidation has occurred.

**Table S1:** N 1s XPS results for C<sub>3</sub>N<sub>4</sub> materials, including % peak area.

| Sample                                   | State                    | Binding Energy (eV) | Peak Area | % Peak Area |
|------------------------------------------|--------------------------|---------------------|-----------|-------------|
| <i>b</i> -C <sub>3</sub> N <sub>4</sub>  | <i>C-N=C</i>             | 398.6               | 7926.71   | 45.2        |
|                                          | <i>N-(C)<sub>3</sub></i> | 399.7               | 4743.46   | 27.0        |
|                                          | <i>C-N-H</i>             | 401.0               | 4877.56   | 27.8        |
| <i>nc</i> -C <sub>3</sub> N <sub>4</sub> | <i>C-N=C</i>             | 398.6               | 14900.75  | 65.3        |
|                                          | <i>N-(C)<sub>3</sub></i> | 399.8               | 5169.3    | 22.7        |
|                                          | <i>C-N-H</i>             | 401.4               | 2753.38   | 12.0        |

**Table S2:** Cu p<sub>3/2</sub> XPS results for C<sub>3</sub>N<sub>4</sub> materials, including % peak area.

| <b>Sample</b>                            | <b>Oxidation State</b>      | <b>Binding Energy (eV)</b> | <b>Peak Area</b> | <b>% Peak Area</b> |
|------------------------------------------|-----------------------------|----------------------------|------------------|--------------------|
| <i>b</i> -C <sub>3</sub> N <sub>4</sub>  | <i>Cu<sup>I</sup></i>       | 932.66                     | 2894.94          | 44.1               |
|                                          | <i>Cu<sup>II</sup></i>      | 934.18                     | 2406.05          | 36.7               |
|                                          | <i>Cu<sup>II</sup> Sat2</i> | 939.00                     | 774.71           | 11.8               |
|                                          | <i>Cu<sup>I</sup> Sat1</i>  | 943.84                     | 484.38           | 7.4                |
| <i>nc</i> -C <sub>3</sub> N <sub>4</sub> | <i>Cu<sup>I</sup></i>       | 932.48                     | 3088.2           | 63.7               |
|                                          | <i>Cu<sup>II</sup></i>      | 934.67                     | 1220.03          | 25.2               |
|                                          | <i>Cu<sup>II</sup> Sat2</i> | 941.6                      | 412.27           | 2.6                |
|                                          | <i>Cu<sup>I</sup> Sat1</i>  | 944.29                     | 127.75           | 8.5                |

**Table S3:** C 1s XPS results for C<sub>3</sub>N<sub>4</sub> materials, including % peak area.

| <b>Sample</b>                            | <b>Oxidation State</b>   | <b>Binding Energy (eV)</b> | <b>Peak Area</b> | <b>% Peak Area</b> |
|------------------------------------------|--------------------------|----------------------------|------------------|--------------------|
| <i>b</i> -C <sub>3</sub> N <sub>4</sub>  | <i>C-C</i>               | 284.8                      | 2171.28          | 17.8               |
|                                          | <i>C-OH</i>              | 286.2                      | 1240.01          | 10.2               |
|                                          | <i>C-(N)<sub>3</sub></i> | 288.3                      | 6557.01          | 53.7               |
|                                          | <i>C-NH</i>              | 290.2                      | 2250.07          | 18.4               |
| <i>nc</i> -C <sub>3</sub> N <sub>4</sub> | <i>C-C</i>               | 284.8                      | 2171.28          | 22.7               |
|                                          | <i>C-OH</i>              | 286.2                      | 971.99           | 6.6                |
|                                          | <i>C-(N)<sub>3</sub></i> | 288.1                      | 8621.38          | 58.3               |
|                                          | <i>C-NH</i>              | 289.3                      | 1840.47          | 12.5               |

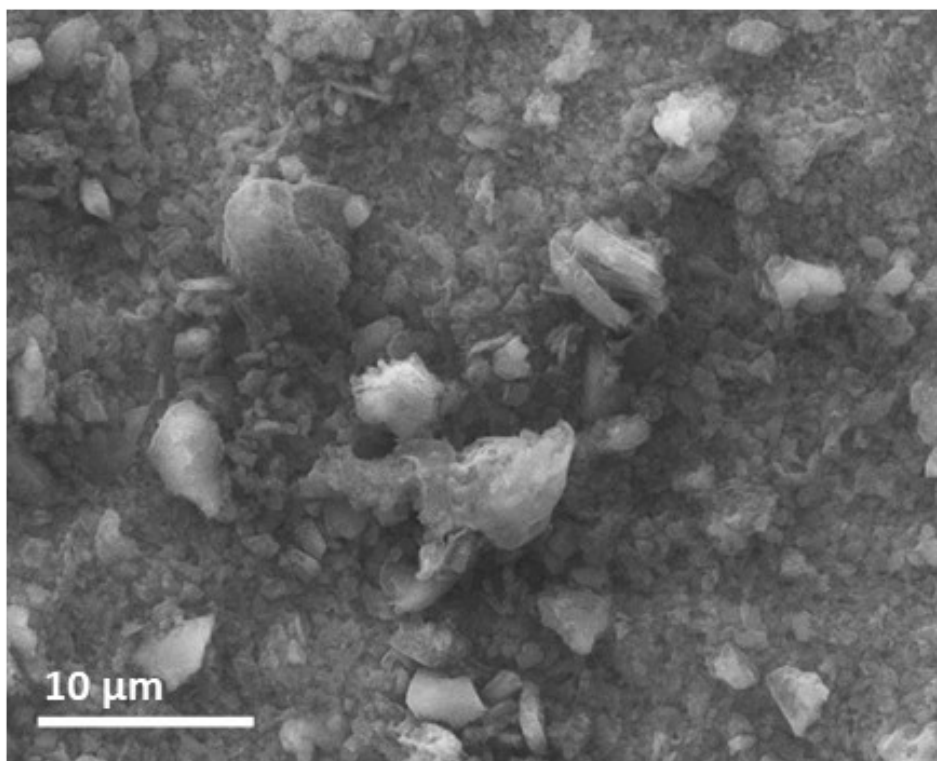

**Figure S5.** SEM image of b-C<sub>3</sub>N<sub>4</sub> particles. Note the non-uniform morphology and broad size distribution (1-10 μm).

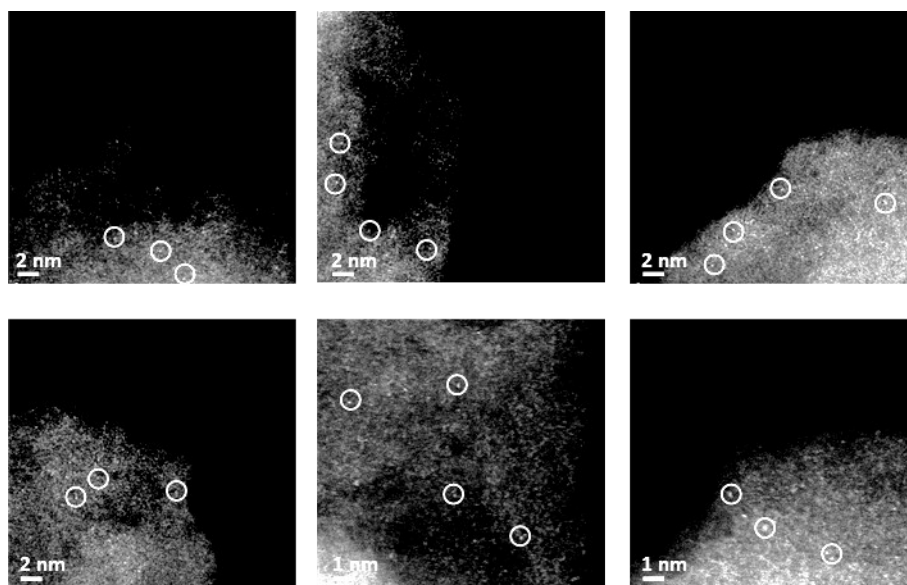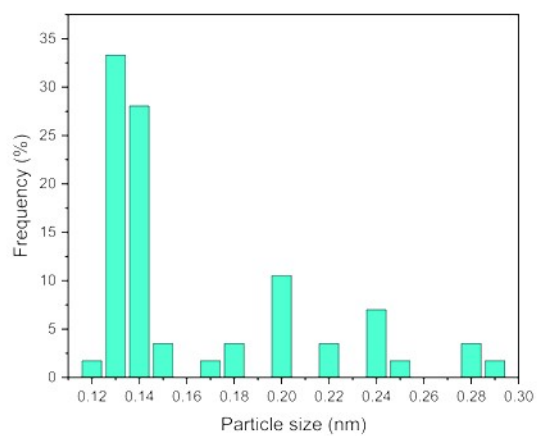

**Figure S6.** AC-STEM images from which particle analysis reveals single atoms (white circles) have a prevalence of around 70 % with the remainder of clusters not exceeding 3 atoms.

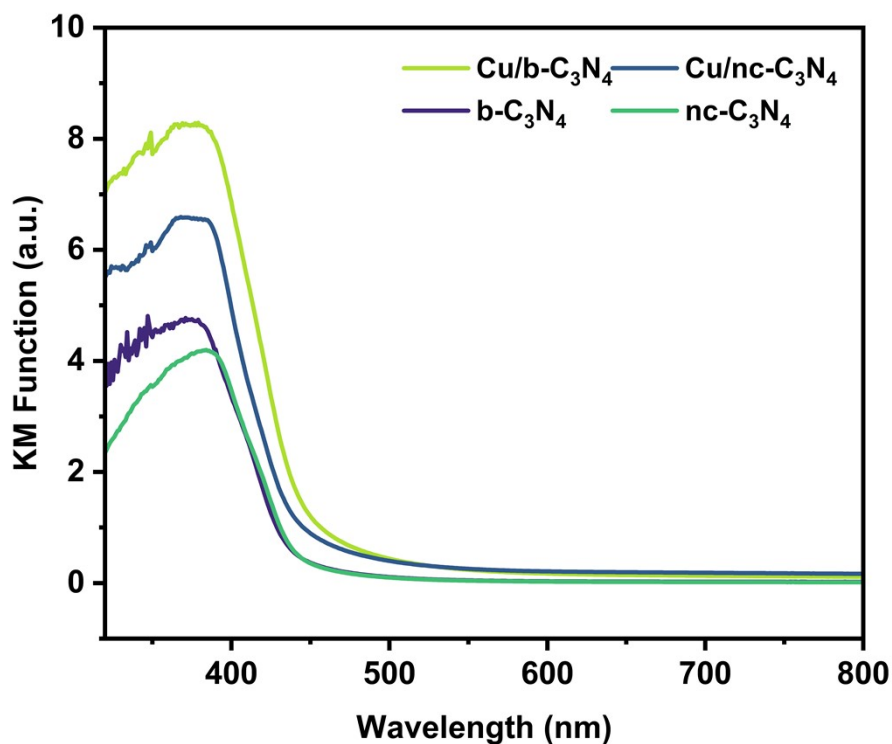

**Figure S7.** UV-Vis absorption spectra are shown for all materials to have an edge commencing at 450 nm, with a peak at 375 nm (black dotted line). Cu-containing materials show higher absorption intensities.

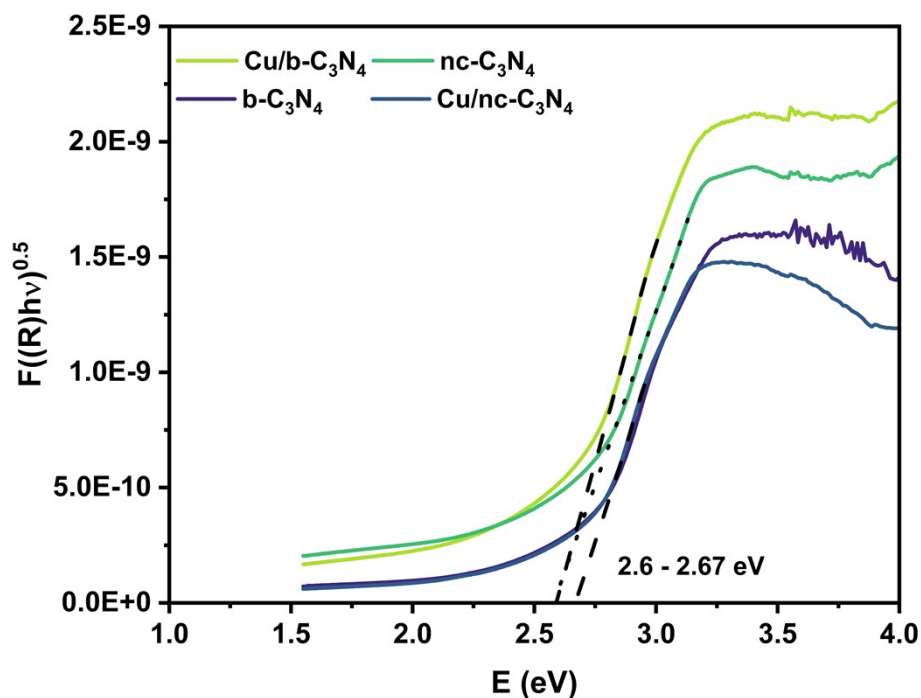

**Figure S8.** Tauc Plot analysis shows materials have a band gap between 2.6 and 2.67 eV (dot/dash intercept extrapolation).

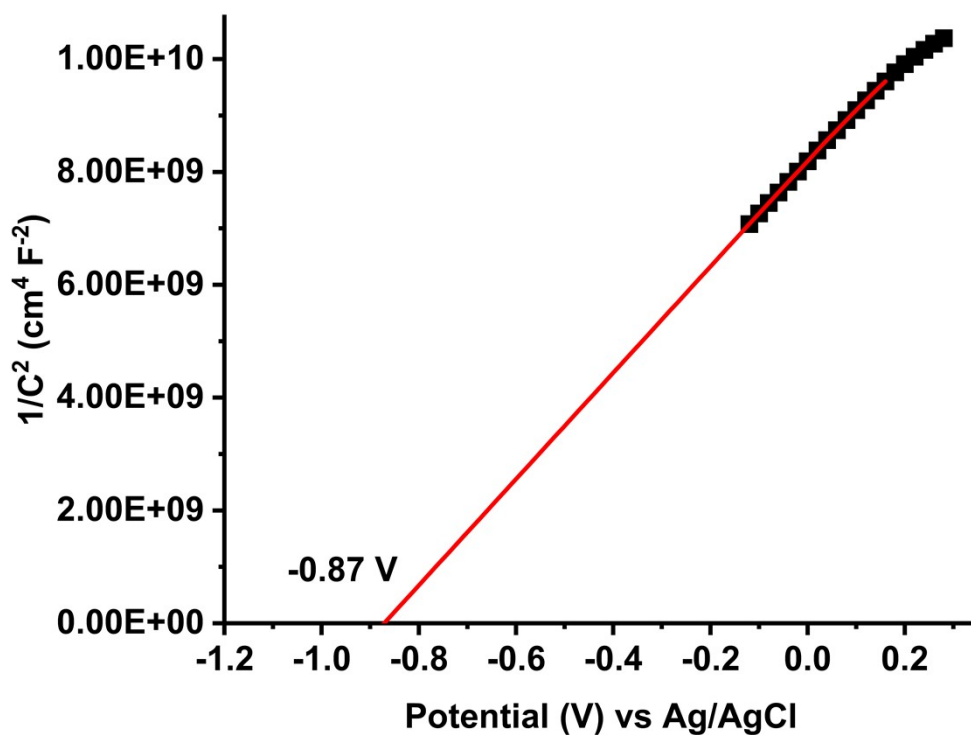

**Figure S9.** Linear region of flat band potential of b- $\text{C}_3\text{N}_4$  (black dots). Intercept extrapolation (red line) shows a conduction band potential of  $-0.87 \text{ V}$  vs Ag/AgCl.

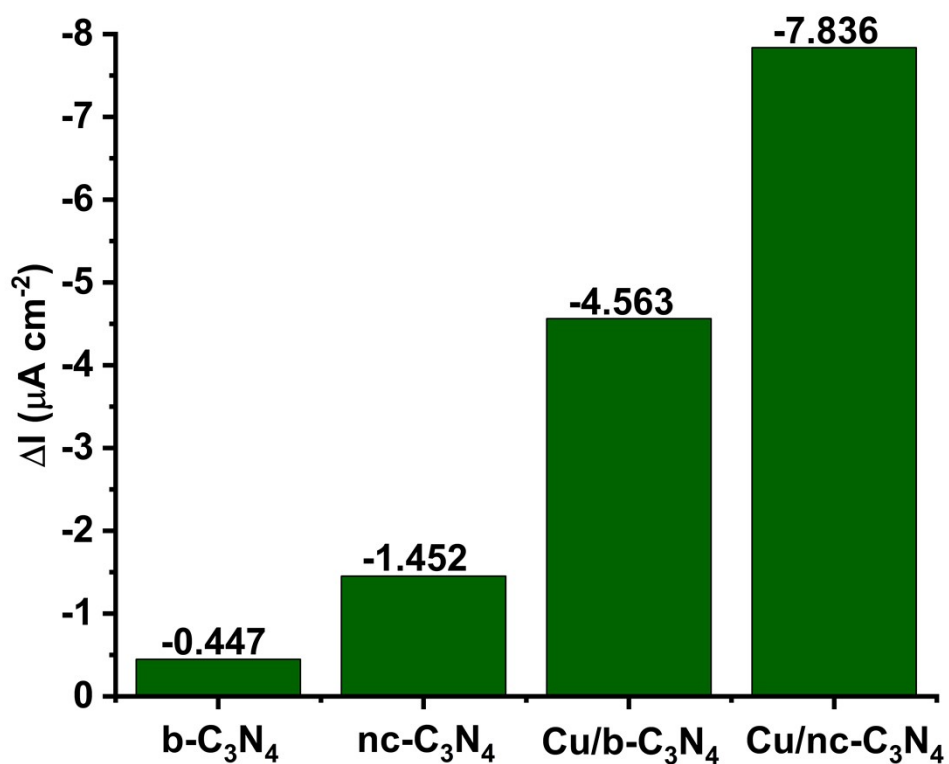

**Figure S10.** Change in current density observed from photocurrent response measurements.



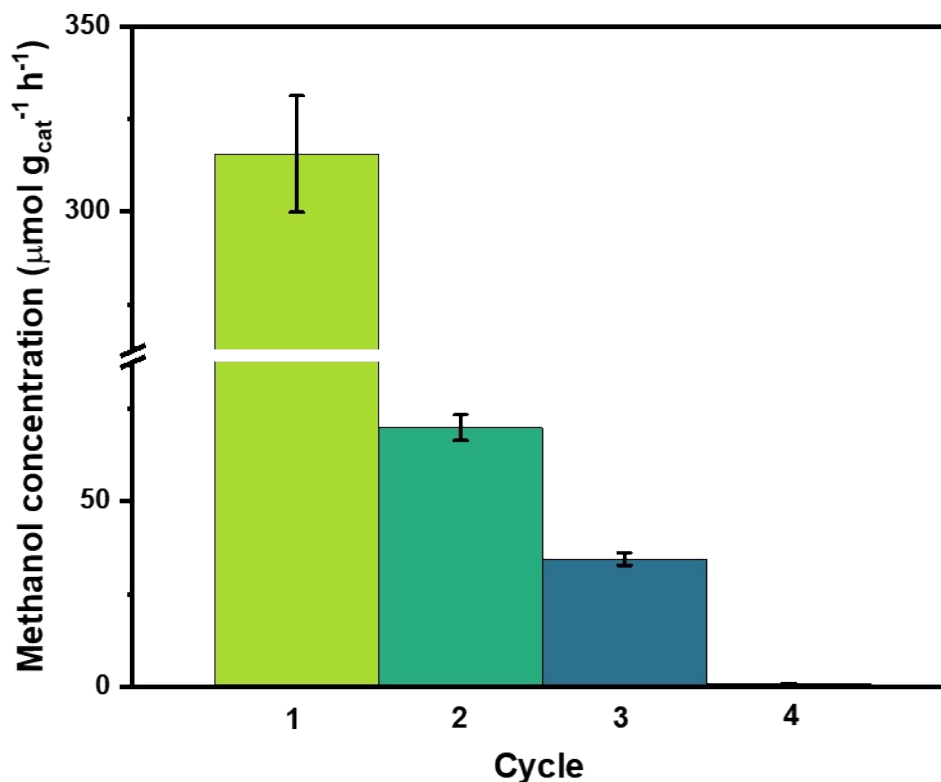

**Figure S11.** The stability of Cu/nc-C<sub>3</sub>N<sub>4</sub> for prolonged methanol production was tested by measuring the methanol concentration for 8 h (composed of 4 consecutive 2 h runs). A 77% decrease in activity is observed during the second cycle ( $70 \mu\text{mol g}_{\text{cat}}^{-1} \text{h}^{-1}$ ) and further by 50% during the third cycle ( $34 \mu\text{mol g}_{\text{cat}}^{-1} \text{h}^{-1}$ ). Methanol is only found in trace amounts upon the fourth cycle. These results suggest that the present Cu/nc-C<sub>3</sub>N<sub>4</sub> catalyst might have changed over time, or the methanol produced during the reaction may be consumed as a hole-scavenger by a long-term reaction. It strongly suggests that product separation is crucial as soon as it is produced during the reaction.

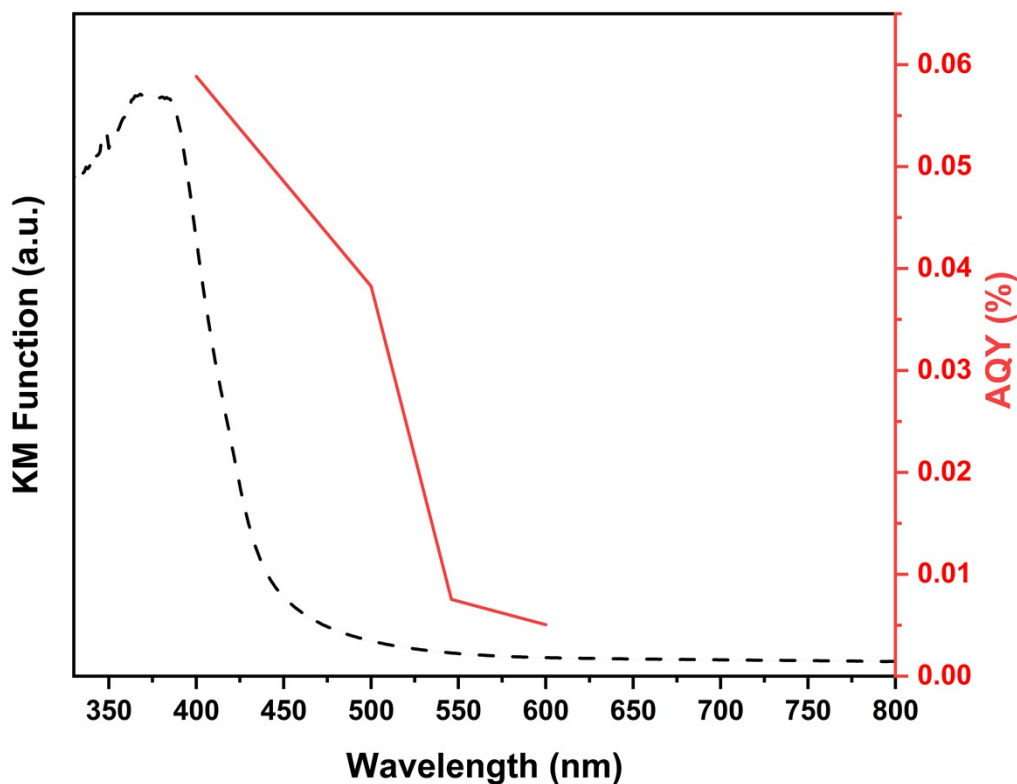

**Figure S12.** The AQY was obtained using Cu/nc-C<sub>3</sub>N<sub>4</sub> (red line) for CH<sub>4</sub> and CH<sub>3</sub>OH and the absorption profile of Cu/nc-C<sub>3</sub>N<sub>4</sub> (black dotted line).

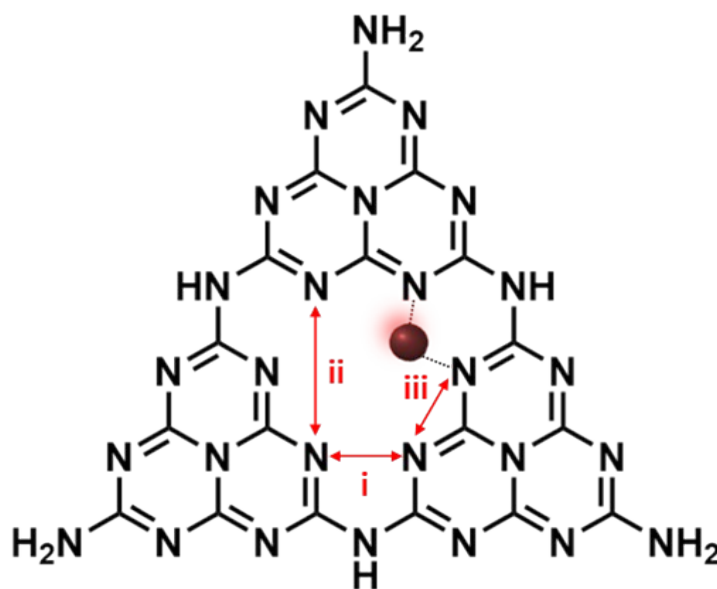

**Figure S13.** Tri-s-triazine vacancy of C<sub>3</sub>N<sub>4</sub> with spacing corresponding to i) 0.26 nm; ii) 0.42 nm and iii) 0.23 nm. Cu(I) with radius 0.074 nm (red circle) is most likely to bind at sites i) assuming theoretical Cu-N bond length values of 0.196 nm.<sup>1</sup>

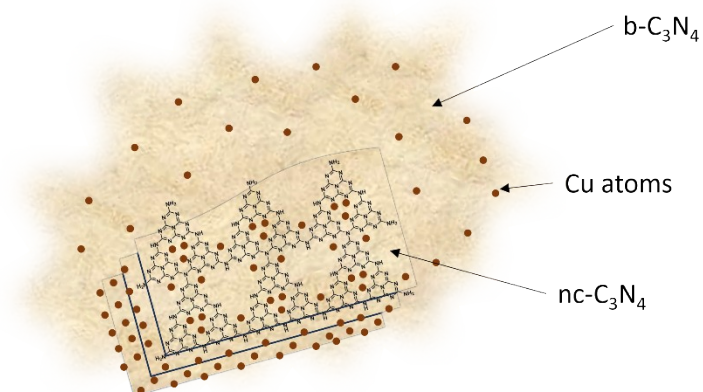

**Figure S14.** Schematic representation of the Cu binding to nc-C<sub>3</sub>N<sub>4</sub> sites achieved through the increased crystallinity, and dangling bonds in these regions.

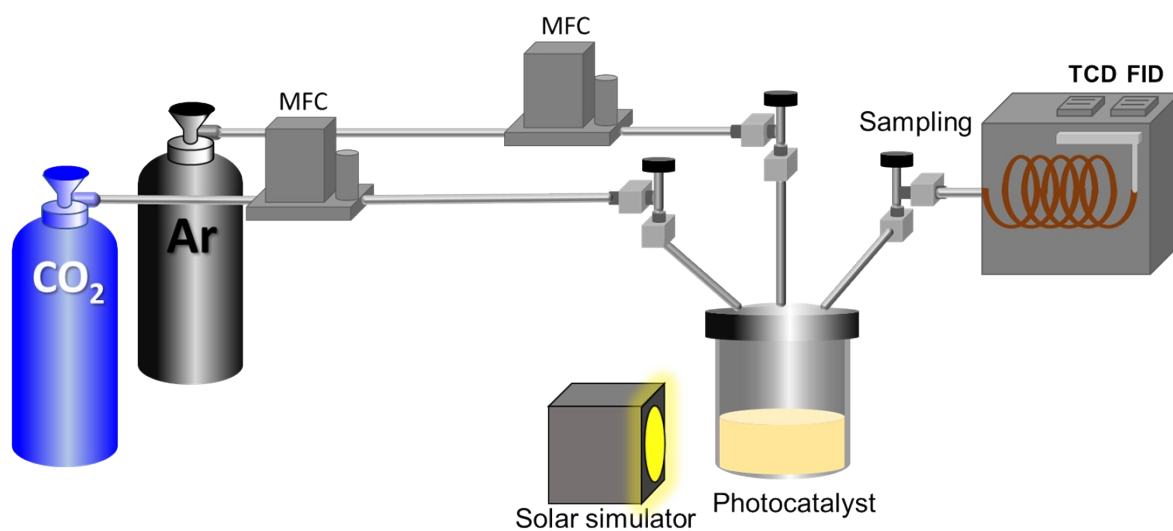

**Figure S15.** Schematic of custom-built Pyrex continuous flow photoreactor equipped with two mass flow controllers. Reactor volume: 28.5 mL, total pipeline volume 5.3 mL.

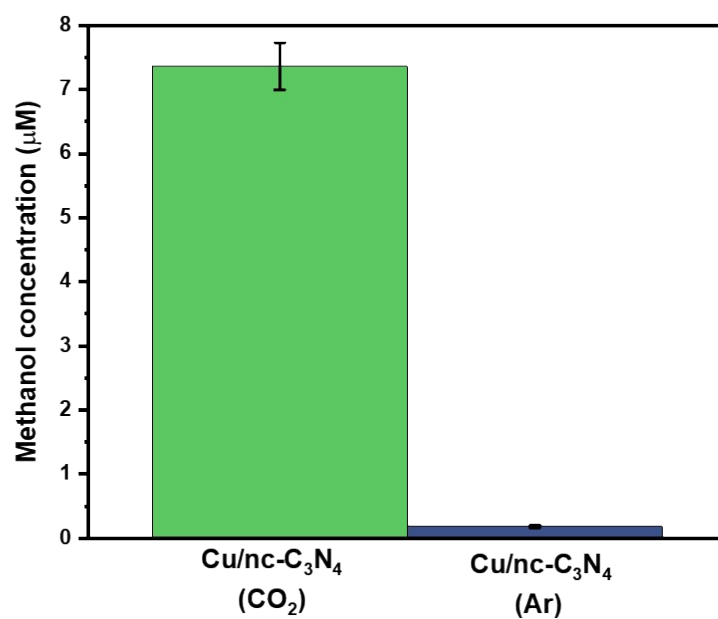

**Figure S16.** Control reaction under Ar (blue) conditions show trace amounts of methanol observed by NMR spectroscopy when compared to the catalyst under CO<sub>2</sub> saturation (green).

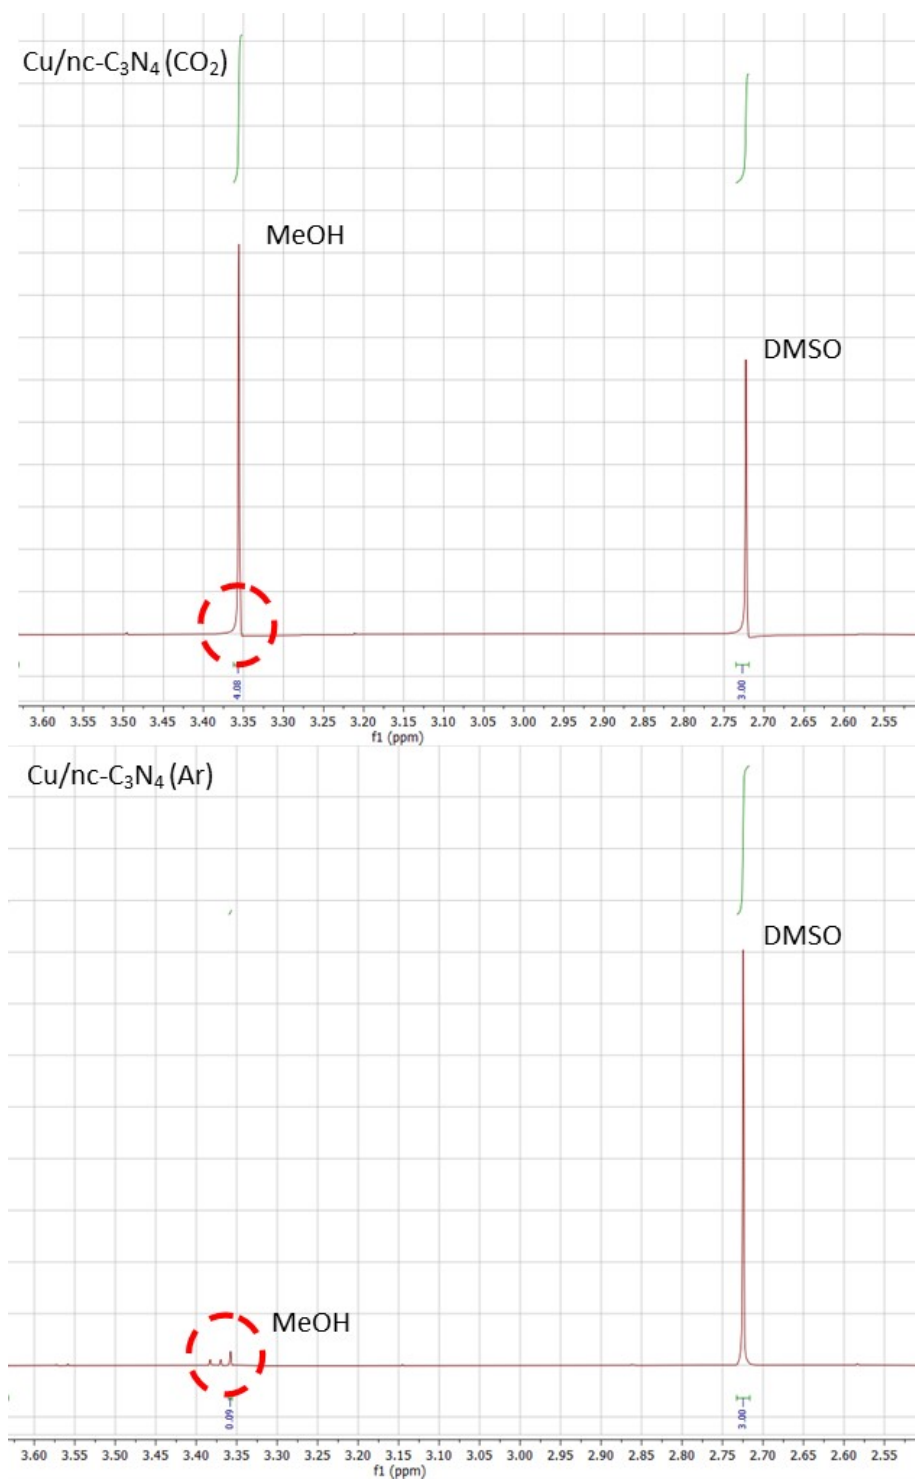

**Figure S17.**  $^1\text{H}$  NMR spectroscopy analysis of methanol formed during  $\text{CO}_2$  photoreduction across  $\text{Cu/nc-C}_3\text{N}_4$  and a control reaction under Ar across  $\text{Cu/nc-C}_3\text{N}_4$  which evidences the carbon source for methanol formation is  $\text{CO}_2$ .

## References

1. A. Sasmal, *et al.*, *Chemical Communications*, 2013, **49**, 7806-7808.
